# Supplementary material for: Nationwide prevalence of human papillomavirus infection and viral genotype distribution in 37 cities in China
Source: PubMed Central journal article supplement (PMC4491249; doi:10.1186/s12879-015-0998-5), 2015-07-04
Supplement: 12879_2015_998_MOESM1_ESM.pdf [file 12879_2015_998_MOESM1_ESM.pdf]

**Table S1. Age-specific HPV infection in each region by HCII**

| regions          | 15-yrs        | 20-yrs        | 30-yrs        | 40-yrs        | 50-60yrs      |
|------------------|---------------|---------------|---------------|---------------|---------------|
| <b>Shanghai</b>  | 0.00%         | 22.81%        | 20.33%        | 27.27%        | 0.00%         |
| <b>Jiangxi</b>   | 25.00%        | 21.79%        | 16.60%        | 18.15%        | 23.66%        |
| <b>Hangzhou</b>  | 19.44%        | 18.83%        | 19.88%        | 19.82%        | 21.45%        |
| <b>East</b>      | <b>18.75%</b> | <b>20.62%</b> | <b>18.71%</b> | <b>19.25%</b> | <b>22.18%</b> |
| <b>Chengdu</b>   | 11.63%        | 22.55%        | 19.69%        | 18.32%        | 15.71%        |
| <b>Guiyang</b>   | 29.52%        | 17.88%        | 21.86%        | 20.86%        | 17.09%        |
| <b>Chongqing</b> | 30.77%        | 29.02%        | 24.43%        | 26.35%        | 34.29%        |
| <b>West</b>      | <b>25.29%</b> | <b>20.98%</b> | <b>21.27%</b> | <b>20.59%</b> | <b>19.01%</b> |
| <b>Guangdong</b> | 33.11%        | 21.76%        | 18.15%        | 18.85%        | 23.26%        |
| <b>Nanning</b>   | 21.15%        | 22.25%        | 22.22%        | 22.32%        | 23.48%        |
| <b>Hainan</b>    | 36.36%        | 22.13%        | 29.49%        | 37.30%        | 34.85%        |
| <b>Changsha</b>  | 50.00%        | 23.15%        | 13.60%        | 15.46%        | 25.00%        |
| <b>Fuzhou</b>    | 19.44%        | 20.91%        | 20.08%        | 20.13%        | 13.95%        |
| <b>South</b>     | <b>31.67%</b> | <b>21.81%</b> | <b>18.72%</b> | <b>19.51%</b> | <b>23.19%</b> |
| <b>Tianjin</b>   | 28.30%        | 26.78%        | 23.19%        | 25.10%        | 23.67%        |
| <b>Jilin</b>     | 37.50%        | 25.30%        | 24.21%        | 24.28%        | 30.16%        |
| <b>Jinan</b>     | 18.64%        | 25.34%        | 26.36%        | 26.18%        | 24.40%        |
| <b>Shenyang</b>  | 71.43%        | 17.11%        | 25.42%        | 24.19%        | 26.32%        |
| <b>North</b>     | <b>25.51%</b> | <b>25.58%</b> | <b>25.58%</b> | <b>25.73%</b> | <b>24.81%</b> |
| <b>Total</b>     | <b>30.55%</b> | <b>22.17%</b> | <b>19.71%</b> | <b>20.55%</b> | <b>23.30%</b> |

In Total. P value for age trend of HPV infection was analyzed by using the linear-by-linear association test ( $P < 0.001$ ). Furthermore, Infection rate is difference in each age group in addition to the margin difference in the age group of 20-yrs and 50-60yrs ( $P = 0.051$ ).

In the Four marco-geographic regions, in addition to the South( $p < 0.001$ ), the other three including the East, West and North were all no significant.( $P = 0.401, 0.595, 0.974$ ) in each age group.

**Table S3. Age-specific prevalence of each subtype HPV by Tellgenplex™ HPV DNA Test**

| <b>Hr HPV ≤20 (463 cases)</b> |          |                |           | <b>21-30(3253 cases)</b> |          |                |           | <b>31-40(2843 cases)</b> |          |                |           | <b>41-50(2090 cases)</b> |          |                |           | <b>≥51(545 cases)</b> |          |                |           |
|-------------------------------|----------|----------------|-----------|--------------------------|----------|----------------|-----------|--------------------------|----------|----------------|-----------|--------------------------|----------|----------------|-----------|-----------------------|----------|----------------|-----------|
| Type                          | Positive | Infection rate | frequency | Type                     | Positive | Infection rate | frequency | Type                     | Positive | Infection rate | frequency | Type                     | Positive | Infection rate | frequency | Type                  | Positive | Infection rate | frequency |
| 26                            | 0        | 0.00%          | 0.00%     | 83                       | 3        | 0.09%          | 0.30%     | 26                       | 2        | 0.07%          | 0.32%     | 26                       | 0        | 0.00%          | 0.00%     | 26                    | 1        | 0.18%          | 0.66%     |
| 35                            | 2        | 0.43%          | 0.82%     | 26                       | 4        | 0.12%          | 0.40%     | 45                       | 7        | 0.25%          | 1.11%     | 35                       | 4        | 0.19%          | 0.87%     | 35                    | 2        | 0.37%          | 1.32%     |
| 83                            | 2        | 0.43%          | 0.82%     | 45                       | 17       | 0.52%          | 1.72%     | 83                       | 7        | 0.25%          | 1.11%     | 45                       | 5        | 0.24%          | 1.08%     | 83                    | 2        | 0.37%          | 1.32%     |
| 31                            | 4        | 0.86%          | 1.65%     | 55                       | 17       | 0.52%          | 1.72%     | 35                       | 10       | 0.35%          | 1.59%     | 82                       | 5        | 0.24%          | 1.08%     | 45                    | 3        | 0.55%          | 1.97%     |
| 33                            | 5        | 1.08%          | 2.06%     | 35                       | 18       | 0.55%          | 1.82%     | 66                       | 10       | 0.35%          | 1.59%     | 83                       | 5        | 0.24%          | 1.08%     | 53                    | 3        | 0.55%          | 1.97%     |
| 53                            | 5        | 1.08%          | 2.06%     | 53                       | 19       | 0.58%          | 1.92%     | 55                       | 14       | 0.49%          | 2.22%     | 51                       | 7        | 0.33%          | 1.52%     | 66                    | 3        | 0.55%          | 1.97%     |
| 55                            | 5        | 1.08%          | 2.06%     | 82                       | 28       | 0.86%          | 2.83%     | 31                       | 16       | 0.56%          | 2.54%     | 66                       | 12       | 0.57%          | 2.60%     | 82                    | 3        | 0.55%          | 1.97%     |
| 39                            | 6        | 1.30%          | 2.47%     | 66                       | 33       | 1.01%          | 3.34%     | 53                       | 17       | 0.60%          | 2.70%     | 53                       | 13       | 0.62%          | 2.82%     | 31                    | 4        | 0.73%          | 2.63%     |
| 45                            | 9        | 1.94%          | 3.70%     | 68                       | 35       | 1.08%          | 3.54%     | 82                       | 19       | 0.67%          | 3.02%     | 55                       | 14       | 0.67%          | 3.04%     | 59                    | 4        | 0.73%          | 2.63%     |
| 82                            | 10       | 2.16%          | 4.12%     | 31                       | 36       | 1.11%          | 3.64%     | 51                       | 22       | 0.77%          | 3.49%     | 31                       | 18       | 0.86%          | 3.90%     | 33                    | 5        | 0.92%          | 3.29%     |
| 66                            | 13       | 2.81%          | 5.35%     | 33                       | 37       | 1.14%          | 3.74%     | 59                       | 23       | 0.81%          | 3.65%     | 56                       | 21       | 1.00%          | 4.56%     | 51                    | 5        | 0.92%          | 3.29%     |
| 18                            | 16       | 3.46%          | 6.58%     | 18                       | 55       | 1.69%          | 5.56%     | 33                       | 29       | 1.02%          | 4.60%     | 59                       | 21       | 1.00%          | 4.56%     | 55                    | 6        | 1.10%          | 3.95%     |
| 51                            | 17       | 3.67%          | 7.00%     | 51                       | 56       | 1.72%          | 5.66%     | 56                       | 30       | 1.06%          | 4.76%     | 33                       | 23       | 1.10%          | 4.99%     | 56                    | 6        | 1.10%          | 3.95%     |
| 56                            | 17       | 3.67%          | 7.00%     | 39                       | 66       | 2.03%          | 6.67%     | 18                       | 31       | 1.09%          | 4.92%     | 68                       | 26       | 1.24%          | 5.64%     | 18                    | 8        | 1.47%          | 5.26%     |
| 68                            | 17       | 3.67%          | 7.00%     | 59                       | 74       | 2.27%          | 7.48%     | 39                       | 32       | 1.13%          | 5.08%     | 18                       | 27       | 1.29%          | 5.86%     | 39                    | 9        | 1.65%          | 5.92%     |
| 58                            | 24       | 5.18%          | 9.88%     | 56                       | 77       | 2.37%          | 7.79%     | 68                       | 41       | 1.44%          | 6.51%     | 39                       | 33       | 1.58%          | 7.16%     | 68                    | 9        | 1.65%          | 5.92%     |
| 59                            | 26       | 5.62%          | 10.70%    | 58                       | 82       | 2.52%          | 8.29%     | 58                       | 78       | 2.74%          | 12.38%    | 58                       | 55       | 2.63%          | 11.93%    | 58                    | 15       | 2.75%          | 9.87%     |
| 16                            | 32       | 6.91%          | 13.17%    | 52                       | 158      | 4.86%          | 15.98%    | 52                       | 114      | 4.01%          | 18.10%    | 52                       | 84       | 4.02%          | 18.22%    | 52                    | 31       | 5.69%          | 20.39%    |
| 52                            | 33       | 7.13%          | 13.58%    | 16                       | 174      | 5.35%          | 17.59%    | 16                       | 128      | 4.50%          | 20.32%    | 16                       | 88       | 4.21%          | 19.09%    | 16                    | 33       | 6.06%          | 21.71%    |
| Total                         | 243      | 52.48%         | 100.00%   | total                    | 989      | 30.40%         | 100.00%   | Total                    | 630      | 22.16%         | 100.00%   | total                    | 461      | 22.06%         | 100.00%   | Total                 | 152      | 27.89%         | 100.00%   |

**LrHPV**

|       |     |        |         |       |     |        |         |       |     |       |         |       |    |       |         |       |    |       |         |
|-------|-----|--------|---------|-------|-----|--------|---------|-------|-----|-------|---------|-------|----|-------|---------|-------|----|-------|---------|
| 6     | 67  | 14.47% | 51.15%  | 6     | 196 | 6.03%  | 48.51%  | 6     | 66  | 2.32% | 44.90%  | 6     | 28 | 1.34% | 37.33%  | 6     | 15 | 2.75% | 31.91%  |
| 11    | 39  | 8.42%  | 29.77%  | 11    | 118 | 3.63%  | 29.21%  | 11    | 33  | 1.16% | 22.45%  | 11    | 13 | 0.62% | 17.33%  | 11    | 9  | 1.65% | 19.15%  |
| 40    | 7   | 1.51%  | 5.34%   | 40    | 23  | 0.71%  | 5.69%   | 40    | 10  | 0.35% | 6.80%   | 40    | 4  | 0.19% | 5.33%   | 40    | 1  | 0.18% | 2.13%   |
| 42    | 3   | 0.65%  | 2.29%   | 42    | 8   | 0.25%  | 1.98%   | 42    | 6   | 0.21% | 4.08%   | 42    | 2  | 0.10% | 2.67%   | 42    | 2  | 0.37% | 4.26%   |
| 44    | 1   | 0.22%  | 0.76%   | 44    | 13  | 0.40%  | 3.22%   | 44    | 10  | 0.35% | 6.80%   | 44    | 11 | 0.53% | 14.67%  | 44    | 7  | 1.28% | 14.89%  |
| 61    | 14  | 3.02%  | 10.69%  | 61    | 46  | 1.41%  | 11.39%  | 61    | 22  | 0.77% | 14.97%  | 61    | 17 | 0.81% | 22.67%  | 61    | 13 | 2.39% | 27.66%  |
| Total | 131 | 28.29% | 100.00% | Total | 404 | 12.42% | 100.00% | Total | 147 | 5.17% | 100.00% | Total | 75 | 3.59% | 100.00% | Total | 47 | 8.62% | 100.00% |

**Table S4. The common combinations of double infections by Tellgenplex™ HPV DNA Test**

| Type1  | Type2  | Positive cases |
|--------|--------|----------------|
| HPV16  | HPV52  | 26             |
| HPV 52 | HPV 58 | 14             |
| HPV16  | HPV59  | 13             |
| HPV 52 | HPV 39 | 11             |
| HPV16  | HPV58  | 10             |
| HPV 16 | HPV 33 | 10             |
| HPV 52 | HPV 68 | 9              |
| HPV16  | HPV56  | 8              |
| HPV16  | HPV39  | 7              |
| HPV16  | HPV68  | 7              |
| HPV16  | HPV51  | 7              |
| HPV 16 | HPV 66 | 6              |
| HPV 52 | HPV 59 | 6              |
| HPV 52 | HPV 18 | 6              |
| HPV 58 | HPV 56 | 6              |
| HPV16  | HPV18  | 5              |
| HPV 16 | HPV 82 | 5              |
| HPV 52 | HPV 56 | 5              |
| HPV 58 | HPV 18 | 5              |
| HPV 58 | HPV 33 | 5              |
| HPV 58 | HPV 66 | 5              |
| HPV 59 | HPV 56 | 5              |
| HPV 39 | HPV 68 | 5              |
| HPV 39 | HPV 53 | 5              |
| HPV 68 | HPV 31 | 5              |

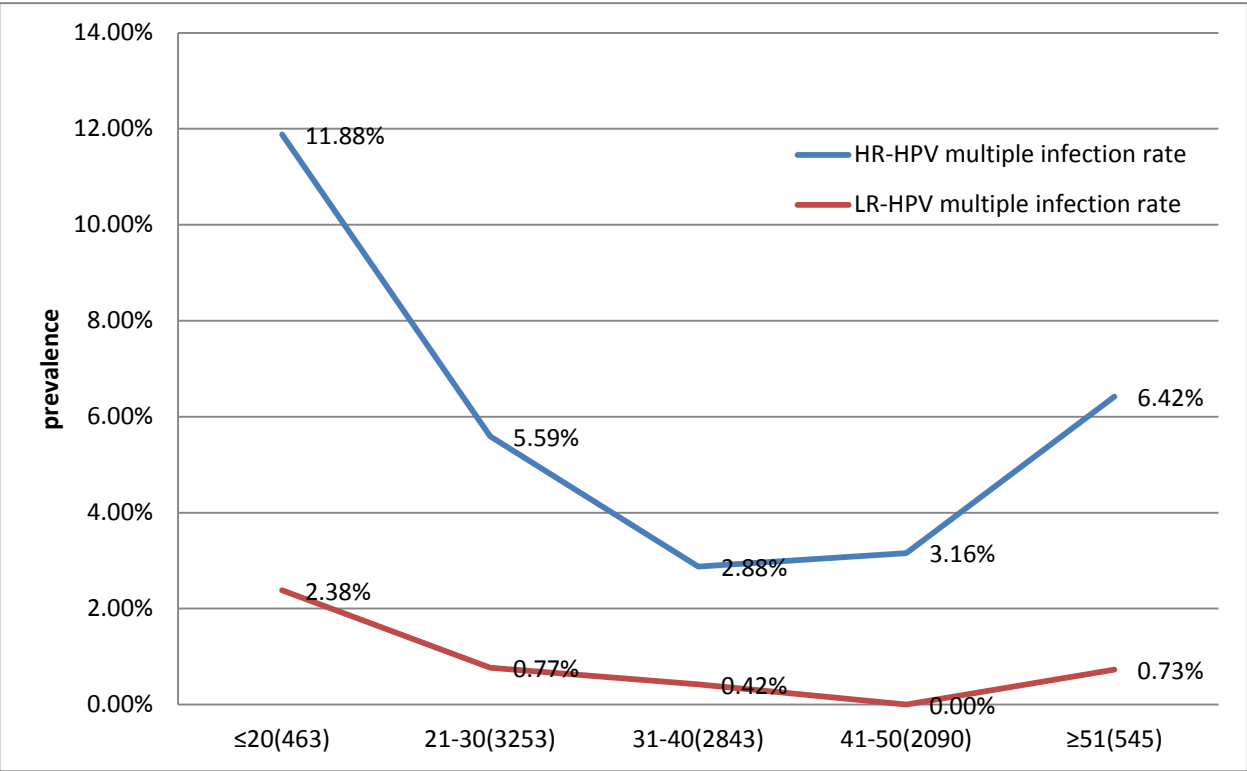

**FigS1. Age-specific multiple infection by Tellgenplex™ HPV DNA Test**

**Table S5 . HPV Prevalence in Women from population-based Screening Studies**

| Author /Pub year      | Study year | Location                                                            | Number(N) | Age Range (yrs) | Lab-assays           | overall HPV prevalence (%) |  |
|-----------------------|------------|---------------------------------------------------------------------|-----------|-----------------|----------------------|----------------------------|--|
| (Belinson et al.2001) | 1999       | Xiangyuan                                                           | 1,997     | 35-45           | HC2                  | 18.2                       |  |
| (Zhao et al., 2001)   | 2001-2002  | Xiangyuan and yangcheng,shanxi                                      | 8,798     | 35-50           | HC2                  | 23.6                       |  |
| (Shen et al., 2003)   | 2001-2002  | Xiangyuan and yangcheng,shanxi                                      | 9,683     | 30-50           | HC2                  | 27.5                       |  |
| (Zou et al., 2011)    | 2004       | Yangcheng                                                           | 745       | 15-59           | HC2                  | 16.0                       |  |
| (Li et al., 2007)     | 2004       | Xiushui, Jiangxi                                                    | 2,432     | 30-49           | HC2                  | 18.5                       |  |
| (Li et al., 2006)     | 2004-2005  | Shenyang                                                            | 685       | 15-59           | GP5+/6+ mediated PCR | 16.8                       |  |
| (Dai et al., 2006)    | 2004-2005  | Yangcheng                                                           | 662       | 15-59           | GP5+/6+ mediated PCR | 14.8                       |  |
| (Wu et al., 2007)     | 2004-2005  | Shenzhen                                                            | 1,027     | 15-59           | GP5+/6+ mediated PCR | 16.6                       |  |
| (Zhao et al., 2012b)  | 1999-2008  | Shanxi, Beijing(18.8), Xinjiang(8.2), Henan(13.03), Shanghai(18.66) | 13,004    | 16-54           | HC2                  | 17.7                       |  |
| (Li et al., 2010)     | 2006-2009  | Beijing                                                             | 6,185     | 25-54           | HC2                  | 9.9                        |  |
| (Ye et al.,2010)      | 2007-2008  | zhejiang                                                            | 5,058     | 20-79           | PCR (MY09/11 primer) | 13.3                       |  |
| (Hu et al., 2011)     | 2009       | Jiangsu                                                             | 316       | 18-25           | HC2                  | 17.1                       |  |
|                       |            | Shanghai                                                            |           |                 |                      |                            |  |
| (Zhang et al.,2013)   | 2011       | Shanghai suburb                                                     | 10,000    | 17-89           | PCR (MY09/11 primer) | 12.6                       |  |

Compared with the region-based data, the results obtained in the present study are higher than those previously reported for Shanghai (this cohort & previously: 22.61% & 18.66% in urban and 12.6% in suburbs)(21, 22), Shenyang (25.32% & 16.8%)(21), Guangdong (20.02% & 16.6% in urban and 9.03% in rural)(23, 24) and Hangzhou (19.85% & 13.3%)(25).
